# Supplementary material for: The Epidemiology of Adult Tracheostomy in the United States 2002–2017: A Serial Cross-Sectional Study
Source: PubMed Central journal article supplement — Crit Care Explor. 2021 Sep 10;3(9):e0523. doi: 10.1097/CCE.0000000000000523 (PMC8437212; doi:10.1097/cce.0000000000000523), 2021-09-10
Supplement: cc9-3-e0523-s001.pdf [file cc9-3-e0523-s001.pdf]

# The Epidemiology of Tracheostomy in the US 2002-2017: a Serial Cross-Sectional Study

Maria K. Abril, MD, MSc  
David M. Berkowitz, MD  
Yunyun Chen, MSPH  
Lance A. Waller, PhD  
Greg S. Martin, MD, MSc  
Jordan A. Kempker, MD, MSc

## Table of Contents

|                                                                                                                                     |    |
|-------------------------------------------------------------------------------------------------------------------------------------|----|
| Table 1. ICD-9-CM Codes Utilized in Case Definitions for Respiratory Failure and Mechanical Ventilation .....                       | 2  |
| Table 2. ICD-9CM to ICD-10CM Crosswalk.....                                                                                         | 2  |
| Table 3. ICD-10-CM Codes Utilized in Case Definitions for Respiratory Failure and Mechanical Ventilation.....                       | 3  |
| Table 4. Recategorization of HCUP ICD-9 Clinical Classification Categories.....                                                     | 4  |
| Table 5. Recategorization of HCUP ICD-9 Clinical Classification Categories.....                                                     | 5  |
| Table 6. Annual Case Volume by Case Definitions .....                                                                               | 7  |
| Table 7. Demographic Characteristics of Patients with Respiratory Failure, Invasive Mechanical Ventilation and Tracheostomy .....   | 8  |
| Table 8. Clinical Characteristics of Patients with Respiratory Failure, Invasive Mechanical Ventilation and Tracheostomy .....      | 9  |
| Table 9. Hospital Characteristics of Patients with Respiratory Failure, Invasive Mechanical Ventilation and Tracheostomy .....      | 11 |
| Table 10. Outcomes of Patients with Respiratory Failure, Invasive Mechanical Ventilation and Tracheostomy .....                     | 12 |
| Table 11. Most Frequent Principle Diagnosis Classes for Respiratory Failure, Invasive Mechanical Ventilation and Tracheostomy ..... | 13 |

**Table 1. ICD-9-CM Codes Utilized in Case Definitions for Respiratory Failure and Mechanical Ventilation**

| ICD-9CM.Code           | Description                                                                           |
|------------------------|---------------------------------------------------------------------------------------|
| <b>Diagnosis Codes</b> |                                                                                       |
| 799.1                  | Respiratory arrest                                                                    |
| 518.5                  | Pulmonary insufficiency following trauma and surgery                                  |
| 518.51                 | Acute respiratory failure following trauma and surgery                                |
| 518.52                 | Other pulmonary insufficiency, not elsewhere classified, following trauma and surgery |
| 518.53                 | Acute and chronic respiratory failure following trauma and surgery                    |
| 518.81                 | Acute respiratory failure                                                             |
| 518.82                 | Other pulmonary insufficiency not elsewhere classified                                |
| 518.83                 | Chronic respiratory failure                                                           |
| 518.84                 | Acute and chronic respiratory failure                                                 |
| <b>Procedure Codes</b> |                                                                                       |
| 96.04                  | Insertion of endotracheal tube                                                        |
| 96.70                  | Continuous mechanical ventilation of unspecified duration                             |
| 96.71                  | Continuous mechanical ventilation of < 96 h consecutively                             |
| 96.72                  | Continuous mechanical ventilation for ≥ 96 h consecutively                            |
| 31.1                   | Temporary tracheostomy                                                                |
| 31.21                  | Mediastinal tracheostomy                                                              |
| 31.29                  | Other permanent tracheostomy                                                          |

**Table 2. ICD-9CM to ICD-10CM Crosswalk**

| Diagnosis Codes |         | Procedure Codes |         |
|-----------------|---------|-----------------|---------|
| ICD9CM          | ICD10CM | ICD9CM          | ICD10CM |
| 518.51          | J958.21 | 31.x            | 0B110F4 |
| 518.51          | J96.00  | 31.x            | 0B110Z4 |
| 518.51          | J96.01  | 31.x            | 0B113F4 |
| 518.51          | J96.02  | 31.x            | 0B113Z4 |
| 518.52          | J95.1   | 31.x            | 0B114F4 |
| 518.52          | J95.2   | 31.x            | 0B114Z4 |
| 518.52          | J95.3   | 39.65           | 5A15223 |
| 518.53          | J958.22 | 93.9            | 5A09357 |
| 518.53          | J96.20  | 93.9            | 5A09457 |
| 518.53          | J96.21  | 93.9            | 5A09557 |
| 518.53          | J96.22  | 96.04           | 0BH17EZ |
| 518.81          | J96.00  | 96.04           | 0BH18EZ |
| 518.81          | J96.01  | 96.7            | 5A1935Z |
| 518.81          | J96.02  | 96.7            | 5A1945Z |
| 518.81          | J96.90  | 96.7            | 5A1955Z |
| 518.81          | J96.91  | 96.71           | 5A1935Z |
| 518.81          | J96.92  | 96.71           | 5A1945Z |
| 518.82          | J80     | 96.72           | 5A1955Z |
| 518.83          | J96.10  |                 |         |
| 518.83          | J96.11  |                 |         |
| 518.83          | J96.12  |                 |         |
| 518.84          | J96.20  |                 |         |
| 518.84          | J96.21  |                 |         |
| 518.84          | J96.22  |                 |         |
| 799.1           | R09.2   |                 |         |

**Table 3. ICD-10-CM Codes Utilized in Case Definitions for Respiratory Failure and Mechanical Ventilation**

| ICD-10CM Code                   | Description                                                                                 |
|---------------------------------|---------------------------------------------------------------------------------------------|
| <b>Diagnosis Codes</b>          |                                                                                             |
| J95.1                           | Acute pulmonary insufficiency following thoracic surgery                                    |
| J95.2                           | Acute pulmonary insufficiency following nonthoracic surgery                                 |
| J95.3                           | Chronic pulmonary insufficiency following surgery                                           |
| J95.821                         | Acute postprocedural respiratory failure                                                    |
| J95.822                         | Acute and chronic postprocedural respiratory failure                                        |
| J96.00                          | Acute respiratory failure unspecified whether with hypoxia or hypercapnia                   |
| J96.01                          | Acute respiratory failure with hypoxia                                                      |
| J96.02                          | Acute respiratory failure with hypercapnia                                                  |
| J96.20                          | Acute and chronic respiratory failure, unspecified whether with hypoxia or hypercapnia      |
| J96.21                          | Acute and chronic respiratory failure with hypoxia                                          |
| J96.22                          | Acute and chronic respiratory failure with hypercapnia                                      |
| J96.90                          | Respiratory failure unspecified whether with hypoxia or hypercapnia                         |
| J96.91                          | Respiratory failure with hypoxia                                                            |
| J96.92                          | Respiratory failure with hypercapnia                                                        |
| J80                             | Acute respiratory distress syndrome                                                         |
| J96.10                          | Chronic respiratory failure, unspecified whether with hypoxia or hypercapnia                |
| J96.11                          | Chronic respiratory failure with hypoxia                                                    |
| J96.12                          | Chronic respiratory failure with hypercapnia                                                |
| R09.2                           | Respiratory Arrest                                                                          |
| <b>Procedure Codes</b>          |                                                                                             |
| Tracheostomy                    |                                                                                             |
| 0B110F4                         | Bypass Trachea to Cutaneous with Tracheostomy Device, Open Approach                         |
| 0B110Z4                         | Bypass Trachea to Cutaneous, Open Approach                                                  |
| 0B113F4                         | Bypass Trachea to Cutaneous with Tracheostomy Device, Percutaneous Approach                 |
| 0B113Z4                         | Bypass Trachea to Cutaneous, Percutaneous Approach                                          |
| 0B114F4                         | Bypass Trachea to Cutaneous with Tracheostomy Device, Percutaneous Endoscopic Approach      |
| 0B114Z4                         | Bypass Trachea to Cutaneous, Percutaneous Endoscopic Approach                               |
| Invasive Mechanical Ventilation |                                                                                             |
| 0BH17EZ                         | Insertion of Endotracheal Airway into Trachea, Via Natural or Artificial Opening            |
| 0BH18EZ                         | Insertion of Endotracheal Airway into Trachea, Via Natural or Artificial Opening Endoscopic |
| 5A1935Z                         | Respiratory Ventilation, Less than 24 Consecutive Hours                                     |
| 5A1945Z                         | Respiratory Ventilation, 24-96 Consecutive Hours                                            |
| 5A1955Z                         | Respiratory Ventilation, Greater than 96 Consecutive Hours                                  |

**Table 4. Recategorization of HCUP ICD-9 Clinical Classification Categories**

| HCUP Clinical Classification Code | HCUP Clinical Classification Description                                          | Recategorization |
|-----------------------------------|-----------------------------------------------------------------------------------|------------------|
| 100                               | Acute myocardial infarction                                                       | Cardiovascular   |
| 101                               | Coronary atherosclerosis and other heart disease                                  | Cardiovascular   |
| 103                               | Pulmonary heart disease                                                           | Cardiovascular   |
| 105                               | Conduction disorders                                                              | Cardiovascular   |
| 106                               | Cardiac dysrhythmias                                                              | Cardiovascular   |
| 107                               | Cardiac arrest and ventricular fibrillation                                       | Cardiovascular   |
| 108                               | Congestive heart failure; nonhypertensive                                         | Cardiovascular   |
| 118                               | Phlebitis; thrombophlebitis and thromboembolism                                   | Cardiovascular   |
| 226                               | Fracture of neck of femur (hip)                                                   | Trauma           |
| 228                               | Skull and face fractures                                                          | Trauma           |
| 229                               | Fracture of upper limb                                                            | Trauma           |
| 230                               | Fracture of lower limb                                                            | Trauma           |
| 231                               | Other fractures                                                                   | Trauma           |
| 234                               | Crushing injury or internal injury                                                | Trauma           |
| 235                               | Open wounds of head; neck; and trunk                                              | Trauma           |
| 236                               | Open wounds of extremities                                                        | Trauma           |
| 240                               | Burns                                                                             | Trauma           |
| 85                                | Coma; stupor; and brain damage                                                    | Neurological     |
| 109                               | Acute cerebrovascular disease                                                     | Neurological     |
| 110                               | Occlusion or stenosis of precerebral arteries                                     | Neurological     |
| 111                               | Other and ill-defined cerebrovascular disease                                     | Neurological     |
| 227                               | Spinal cord injury                                                                | Neurotrauma      |
| 233                               | Intracranial injury                                                               | Neurotrauma      |
| 127                               | Chronic obstructive pulmonary disease and bronchiectasis                          | Respiratory      |
| 128                               | Asthma                                                                            | Respiratory      |
| 129                               | Aspiration pneumonitis; food/vomitus                                              | Respiratory      |
| 131                               | Respiratory failure; insufficiency; arrest (adult)                                | Respiratory      |
| 132                               | Lung disease due to external agents                                               | Respiratory      |
| 133                               | Other lower respiratory disease                                                   | Respiratory      |
| 134                               | Other upper respiratory disease                                                   | Respiratory      |
| 221                               | Respiratory distress syndrome                                                     | Respiratory      |
| 2                                 | Septicemia (except in labor)                                                      | Infection        |
| 3                                 | Bacterial infection; unspecified site                                             | Infection        |
| 4                                 | Mycoses                                                                           | Infection        |
| 7                                 | Viral infection                                                                   | Infection        |
| 76                                | Meningitis (except that caused by tuberculosis or sexually transmitted disease)   | Infection        |
| 77                                | Encephalitis (except that caused by tuberculosis or sexually transmitted disease) | Infection        |
| 122                               | Pneumonia (except that caused by tuberculosis or sexually transmitted disease)    | Infection        |
| 123                               | Influenza                                                                         | Infection        |
| 197                               | Skin and subcutaneous tissue infections                                           | Infection        |

For space, the total 285 Clinical Classification Codes are not included here

**Table 5. Recategorization of HCUP ICD-9 Clinical Classification Categories**

| HCUP Clinical Classification Code | HCUP Clinical Classification Description                                     | Recategorization |
|-----------------------------------|------------------------------------------------------------------------------|------------------|
| CIR009                            | Acute myocardial infarction                                                  | Cardiovascular   |
| CIR010                            | Complications of acute myocardial infarction                                 | Cardiovascular   |
| CIR011                            | Coronary atherosclerosis and other heart disease                             | Cardiovascular   |
| CIR013                            | Acute pulmonary embolism                                                     | Cardiovascular   |
| CIR014                            | Pulmonary heart disease                                                      | Cardiovascular   |
| CIR016                            | Conduction disorders                                                         | Cardiovascular   |
| CIR017                            | Cardiac dysrhythmias                                                         | Cardiovascular   |
| CIR018                            | Cardiac arrest and ventricular fibrillation                                  | Cardiovascular   |
| CIR019                            | Heart failure                                                                | Cardiovascular   |
| CIR027                            | Arterial dissections                                                         | Cardiovascular   |
| CIR029                            | Aortic; peripheral; and visceral artery aneurysms                            | Cardiovascular   |
| CIR030                            | Aortic and peripheral arterial embolism or thrombosis                        | Cardiovascular   |
| CIR033                            | Acute phlebitis; thrombophlebitis and thromboembolism                        | Cardiovascular   |
| CIR034                            | Chronic phlebitis; thrombophlebitis and thromboembolism                      | Cardiovascular   |
| CIR020                            | Cerebral infarction                                                          | Neurological     |
| CIR021                            | Acute hemorrhagic cerebrovascular disease                                    | Neurological     |
| CIR022                            | Sequela of hemorrhagic cerebrovascular disease                               | Neurological     |
| CIR023                            | Occlusion or stenosis of precerebral or cerebral arteries without infarction | Neurological     |
| CIR024                            | Other and ill-defined cerebrovascular disease                                | Neurological     |
| CIR025                            | Sequela of cerebral infarction and other cerebrovascular disease             | Neurological     |
| INJ008                            | Traumatic brain injury (TBI); concussion, initial encounter                  | Neurotrauma      |
| INJ009                            | Spinal cord injury (SCI), initial encounter                                  | Neurotrauma      |
| RSP007                            | Other specified and unspecified upper respiratory disease                    | Respiratory      |
| RSP008                            | Chronic obstructive pulmonary disease and bronchiectasis                     | Respiratory      |
| RSP009                            | Asthma                                                                       | Respiratory      |
| RSP010                            | Aspiration pneumonitis                                                       | Respiratory      |
| RSP011                            | Pleurisy, pleural effusion and pulmonary collapse                            | Respiratory      |
| RSP012                            | Respiratory failure; insufficiency; arrest                                   | Respiratory      |
| RSP013                            | Lung disease due to external agents                                          | Respiratory      |
| RSP014                            | Pneumothorax                                                                 | Respiratory      |
| RSP015                            | Mediastinal disorders                                                        | Respiratory      |
| RSP016                            | Other specified and unspecified lower respiratory disease                    | Respiratory      |
| INF002                            | Septicemia                                                                   | Infection        |
| INF003                            | Bacterial infections                                                         | Infection        |
| INF004                            | Fungal infections                                                            | Infection        |
| INF008                            | Viral infection                                                              | Infection        |
| RSP002                            | Pneumonia (except that caused by tuberculosis)                               | Infection        |
| RSP003                            | Influenza                                                                    | Infection        |
| RSP004                            | Acute and chronic tonsillitis                                                | Infection        |
| RSP005                            | Acute bronchitis                                                             | Infection        |
| RSP006                            | Other specified upper respiratory infections                                 | Infection        |
| SKN001                            | Skin and subcutaneous tissue infections                                      | Infection        |
| EXT001                            | External cause codes: cut/pierce; initial encounter                          | Trauma           |
| EXT002                            | External cause codes: drowning/submersion; initial encounter                 | Trauma           |
| EXT003                            | External cause codes: fall; initial encounter                                | Trauma           |
| EXT004                            | External cause codes: fire/burn; initial encounter                           | Trauma           |

|        |                                                                                |        |
|--------|--------------------------------------------------------------------------------|--------|
| EXT005 | External cause codes: firearm; initial encounter                               | Trauma |
| EXT006 | External cause codes: machinery; initial encounter                             | Trauma |
| EXT007 | External cause codes: motor vehicle traffic (MVT); initial encounter           | Trauma |
| EXT008 | External cause codes: pedal cyclist; not MVT; initial encounter                | Trauma |
| EXT009 | External cause codes: pedestrian; not MVT; initial encounter                   | Trauma |
| EXT010 | External cause codes: transport; not MVT; initial encounter                    | Trauma |
| EXT011 | External cause codes: natural/environment; initial encounter                   | Trauma |
| EXT012 | External cause codes: bites; initial encounter                                 | Trauma |
| EXT013 | External cause codes: overexertion; initial encounter                          | Trauma |
| EXT014 | External cause codes: poisoning by drug                                        | Trauma |
| EXT015 | External cause codes: poisoning by non-drug                                    | Trauma |
| EXT016 | External cause codes: struck by; against; initial encounter                    | Trauma |
| EXT017 | External cause codes: suffocation/inhalation; initial encounter                | Trauma |
| EXT018 | External cause codes: other specified, classifiable and NEC; initial encounter | Trauma |
| EXT019 | External cause codes: unspecified mechanism                                    | Trauma |
| INJ001 | Fracture of head and neck, initial encounter                                   | Trauma |
| INJ002 | Fracture of the spine and back, initial encounter                              | Trauma |
| INJ003 | Fracture of torso, initial encounter                                           | Trauma |
| INJ004 | Fracture of the upper limb, initial encounter                                  | Trauma |
| INJ005 | Fracture of the lower limb (except hip), initial encounter                     | Trauma |
| INJ006 | Fracture of the neck of the femur (hip), initial encounter                     | Trauma |
| INJ007 | Dislocations, initial encounter                                                | Trauma |
| INJ010 | Internal organ injury, initial encounter                                       | Trauma |
| INJ011 | Open wounds of head and neck, initial encounter                                | Trauma |
| INJ012 | Open wounds to limbs, initial encounter                                        | Trauma |
| INJ013 | Open wounds of trunk, initial encounter                                        | Trauma |
| INJ014 | Amputation of a limb, initial encounter                                        | Trauma |
| INJ015 | Amputation of other body parts, initial encounter                              | Trauma |
| INJ016 | Injury to blood vessels, initial encounter                                     | Trauma |
| INJ017 | Superficial injury; contusion, initial encounter                               | Trauma |
| INJ018 | Crushing injury, initial encounter                                             | Trauma |
| INJ019 | Burn and corrosion, initial encounter                                          | Trauma |
| INJ020 | Effect of foreign body entering opening, initial encounter                     | Trauma |
| INJ021 | Effect of other external causes, initial encounter                             | Trauma |

For space, the total 530 Clinical Classification Codes are not included here

**Table 6. Annual Case Volume by Case Definitions**

|                                                       | 02        |             |             | 03        |             |             | 04        |             |             | 05        |             |             | 06        |             |             | 07        |             |             | 08        |             |             | 09        |             |             | 10        |           |             | 11        |             |             | 12        |             |             | 13        |             |             | 14        |             |             | 16        |             |             | 17        |             |             |
|-------------------------------------------------------|-----------|-------------|-------------|-----------|-------------|-------------|-----------|-------------|-------------|-----------|-------------|-------------|-----------|-------------|-------------|-----------|-------------|-------------|-----------|-------------|-------------|-----------|-------------|-------------|-----------|-----------|-------------|-----------|-------------|-------------|-----------|-------------|-------------|-----------|-------------|-------------|-----------|-------------|-------------|-----------|-------------|-------------|-----------|-------------|-------------|
|                                                       | Est       | L95         | U95         | Est       | L95       | U95         | Est       | L95         | U95         | Est       | L95         | U95         | Est       | L95         | U95         | Est       | L95         | U95         |           |             |             |           |             |             |
| <b>N of tracheostomy</b>                              | 806<br>12 | 7443<br>9.7 | 8678<br>5.1 | 861<br>15 | 7912<br>9.9 | 9310<br>0.1 | 868<br>43 | 8013<br>2.5 | 9355<br>4.1 | 859<br>41 | 7944<br>5.7 | 9243<br>6.9 | 888<br>74 | 8275<br>5.6 | 9499<br>2.5 | 886<br>39 | 8097<br>9.3 | 9629<br>7.6 | 895<br>45 | 8182<br>0.8 | 9726<br>8.2 | 863<br>53 | 7960<br>6.1 | 9310<br>0.1 | 891<br>59 | 809<br>93 | 9732<br>5.1 | 821<br>12 | 7431<br>6.4 | 8990<br>7.4 | 796<br>15 | 7578<br>5.5 | 8344<br>4.5 | 770<br>75 | 7372<br>8.7 | 8042<br>1.3 | 738<br>90 | 7082<br>8.4 | 7695<br>1.7 | 751<br>05 | 7207<br>2.1 | 7813<br>7.8 | 715<br>50 | 6853<br>7.3 | 7456<br>2.7 |
| <b>Tracheostomies per 100,000 US adults</b>           | 37.5      | 34.7        | 40.4        | 39.7      | 36.5        | 42.9        | 39.6      | 36.5        | 42.6        | 38.7      | 35.8        | 41.6        | 39.6      | 36.8        | 42.3        | 39.0      | 35.6        | 42.4        | 38.9      | 35.6        | 42.3        | 37.1      | 34.2        | 40.0        | 37.9      | 34.4      | 41.4        | 34.5      | 31.3        | 37.8        | 33.1      | 31.5        | 34.7        | 31.7      | 30.4        | 33.1        | 30.1      | 28.9        | 31.4        | 30.1      | 28.9        | 31.3        | 28.4      | 27.2        | 29.6        |
| <b>Percent of RF-IMV discharges with tracheostomy</b> | 10.4      | 9.4         | 10.9        | 10.8      | 10.3        | 11.3        | 10.9      | 10.4        | 11.4        | 10.6      | 10.0        | 11.1        | 10.6      | 10.1        | 11.1        | 10.6      | 9.9         | 11.2        | 10.4      | 9.9         | 10.9        | 9.9       | 9.3         | 10.4        | 9.9       | 9.3       | 10.5        | 9.4       | 8.9         | 9.9         | 9.0       | 8.7         | 9.3         | 8.5       | 8.3         | 8.8         | 8.2       | 80.0        | 8.5         | 8.0       | 7.7         | 8.2         | 7.4       | 7.2         | 7.6         |













**Table 11. Most Frequent Principle Diagnosis Classes for Respiratory Failure, Invasive Mechanical Ventilation and Tracheostomy**

| Diagnosis      | 2002 | 2003 | 2004 | 2005 | 2006 | 2007 | 2008 | 2009 | 2010 | 2011 | 2012 | 2013 | 2014 | 2016 | 2017 |
|----------------|------|------|------|------|------|------|------|------|------|------|------|------|------|------|------|
| Respiratory    | 25.5 | 24.2 | 22.8 | 27.4 | 25.5 | 22.2 | 22.8 | 20.3 | 17.6 | 18.8 | 18.3 | 17.0 | 16.3 | 15.3 | 15.1 |
| Infection      | 11.5 | 11.7 | 12.5 | 14.3 | 15.3 | 17.1 | 18.5 | 20.2 | 19.0 | 22.2 | 21.4 | 23.7 | 25.8 | 26.9 | 25.4 |
| Cardiovascular | 10.2 | 9.5  | 9.2  | 8.5  | 7.9  | 6.7  | 7.1  | 7.0  | 5.9  | 6.1  | 6.7  | 6.7  | 6.5  | 7.8  | 8.0  |
| Neurological   | 8.2  | 9.0  | 8.8  | 8.3  | 8.6  | 8.7  | 8.4  | 8.4  | 9.3  | 8.2  | 9.4  | 9.2  | 9.5  | 9.4  | 10.2 |
| Neurotrauma    | 8.1  | 7.9  | 10.2 | 7.6  | 9.1  | 10.3 | 8.8  | 9.6  | 11.4 | 9.1  | 10.5 | 10.0 | 10.1 | 9.0  | 9.4  |
| Trauma         | 6.1  | 6.3  | 7.6  | 5.3  | 6.9  | 7.4  | 6.2  | 6.1  | 8.6  | 6.7  | 6.9  | 6.9  | 6.8  | 8.9  | 8.8  |
